# Supplementary material for: Effect of polycation nanostructures on cell membrane permeability and toxicity
Source: Royal Society of Chemistry journal article supplement (doi:10.1039/d1en01156a), 2022-01-01
Supplement: d1en01156a1.pdf [file d1en01156a1.pdf]

## Supporting Information

# Effect of Polycation Nanostructures on Cell Membrane Permeability and Toxicity

Magdalena Wytrwal-Sarna, Paulina Knobloch, Sławomir Lasota, Marta Michalik, Maria  
Nowakowska, Mariusz Kepczynski

### 1. Determination of the critical micellar concentration (CMC) for PAMAks.

The CMC value for the polycations was determined using a fluorescent molecular probe technique as described previously.<sup>1</sup> A stock solution of 1,6-diphenyl-1,3,5-hexatriene was prepared in methanol at a concentration of 0.4 mM by short sonication in a bath sonicator. A series of samples containing PAMAks at various concentrations (0 - 0.1 mg/mL) and a constant DPH concentration (4  $\mu$ M) were prepared and stirred for 4 hours in the dark. The fluorescence spectra of these samples were measured using the FS5 Spectrofluorometer (Edinburgh Instrument) (**Fig. S1**). The samples were excited at 350 nm and the fluorescence intensity at 440 nm in the presence of PAMAks was analyzed. Results are presented in **Table 1** and **Fig. 2** and **S2**.

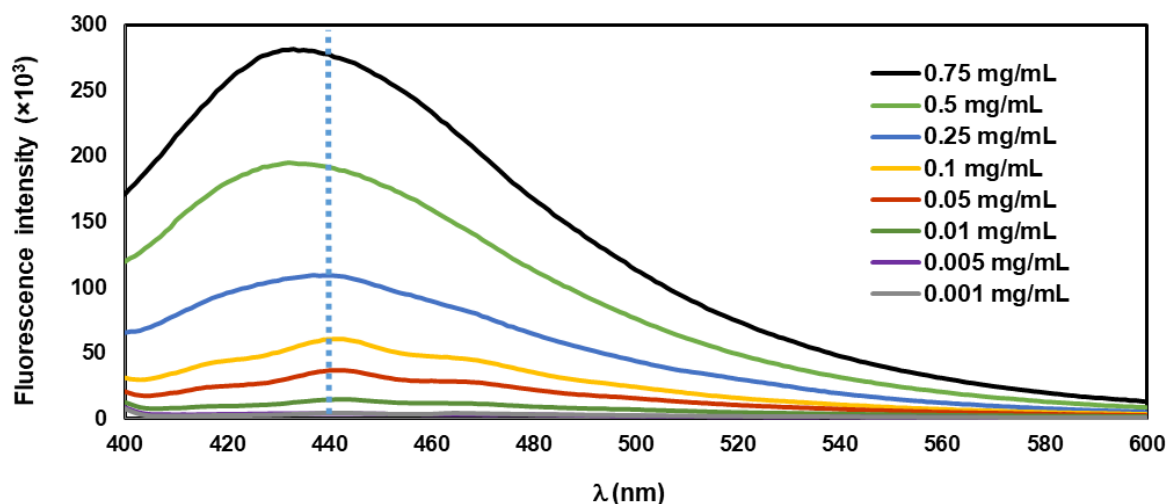

**Fig. S1** Fluorescence spectra of DPH ( $c_{\text{DPH}} = 4 \mu\text{M}$ ,  $\lambda_{\text{ex}} = 350 \text{ nm}$ ) at selected concentrations of PAMBut.

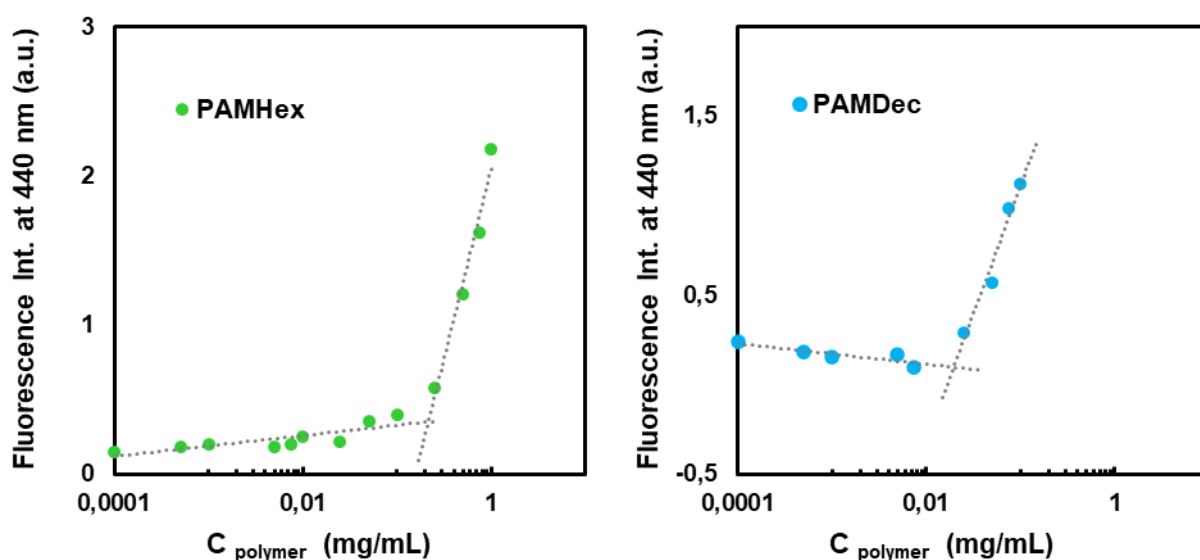

**Fig. S2** The fluorescence intensity of DPH probe ( $c_{\text{DPH}} = 4 \mu\text{M}$ ,  $\lambda_{\text{ex}} = 350 \text{ nm}$ ,) at 440 nm as a function of the concentration of PAMHex and PAMDec.

## 2. Dynamic light scattering (DLS) and $\zeta$ -potential measurements of polymers

The distribution profiles of the hydrodynamic diameters were measured by light scattering experiments (Zetasizer, Malvern) for the aqueous solution of PAMAlks at the concentration of 1 mg/mL. Samples were filtrated by 0.45  $\mu\text{m}$  pores size filters. The mean hydrodynamic

diameter (dz), dispersity (PDI), and  $\zeta$ -potential for the observed objects are presented in Table 2.

### **3. Dynamic light scattering (DLS) and $\zeta$ -potential - optimization of liposomes coating by polymers**

Polymer-coated anionic liposomes were prepared at various lipid/polymer weight ratios in a 1 mM NaCl solution. Different volumes of the PAM and PAMAks solutions (0.5 mg/mL) were mixed with the liposome suspension (2.5 mg in 0.5 mL) to the final volume of 1 mL. The optimal polymer content was determined from DLS and  $\zeta$ -potential measurements. The crucial criteria were: small size and PDI as well as overloading the  $\zeta$ -potential of the POPC/POPA liposomes to stable positive values (above 30 mV). The optimal polymer content is indicated in bold in **Table S1**.

**Table S1** The values of the mean hydrodynamic diameter (dz), polydispersity index (PDI), and the  $\zeta$ -potential at 298 K of the POPC/DOPA liposomes ( $C_{lipid} = 1.25$  mg/mL) dispersed in the 1 mM NaCl solution at pH 7.4 and treated with polycations (values are the mean  $\pm$  standard deviation). The chosen optimized polycation content was marked in bold.

| System                | Polycation content (wt%) | dz (nm) (n = 5)                   | PDI (n = 5)                       | $\zeta$ -potential (mV) (n = 8)  |
|-----------------------|--------------------------|-----------------------------------|-----------------------------------|----------------------------------|
| Liposomes (POPC/DOPA) | 0                        | 112.0 $\pm$ 0.9                   | 0.08 $\pm$ 0.02                   | -42.7 $\pm$ 2.8                  |
| + PAM                 | 1.6                      | > 10 <sup>5</sup>                 | 0.92 $\pm$ 0.18                   | -17.4 $\pm$ 1.4                  |
|                       | 2.4                      | 318.5 $\pm$ 0.3                   | 0.34 $\pm$ 0.09                   | 19.1 $\pm$ 1.5                   |
|                       | 3.2                      | 175.6 $\pm$ 0.3                   | 0.21 $\pm$ 0.04                   | 32.9 $\pm$ 2.6                   |
|                       | <b>4.0</b>               | <b>153.7 <math>\pm</math> 0.2</b> | <b>0.16 <math>\pm</math> 0.02</b> | <b>34.2 <math>\pm</math> 3.0</b> |
|                       | 4.8                      | 149.1 $\pm$ 0.2                   | 0.21 $\pm$ 0.02                   | 37.2 $\pm$ 2.9                   |
|                       | 5.6                      | 139.7 $\pm$ 0.1                   | 0.13 $\pm$ 0.03                   | 39.1 $\pm$ 1.1                   |
| + PAMBut              | 3.2                      | 160.2 $\pm$ 1.8                   | 0.21 $\pm$ 0.03                   | 19.9 $\pm$ 1.0                   |
|                       | 4.0                      | 153.5 $\pm$ 2.1                   | 0.17 $\pm$ 0.02                   | 22.4 $\pm$ 2.4                   |
|                       | 4.8                      | 150.1 $\pm$ 3.2                   | 0.15 $\pm$ 0.05                   | 27.0 $\pm$ 1.5                   |
|                       | <b>5.6</b>               | <b>156.0 <math>\pm</math> 3.1</b> | <b>0.13 <math>\pm</math> 0.04</b> | <b>37.9 <math>\pm</math> 1.8</b> |
|                       | 6.4                      | 147.6 $\pm$ 2.0                   | 0.13 $\pm$ 0.03                   | 36.0 $\pm$ 1.9                   |
|                       | 7.2                      | 140.5 $\pm$ 0.1                   | 0.13 $\pm$ 0.04                   | 36.3 $\pm$ 2.2                   |
| + PAMHex              | 2.4                      | > 10 <sup>5</sup>                 | 1.00 $\pm$ 0.00                   | -12.0 $\pm$ 1.0                  |
|                       | 3.2                      | > 10 <sup>5</sup>                 | 1.00 $\pm$ 0.00                   | 7.0 $\pm$ 1.3                    |
|                       | 4.0                      | 307.6 $\pm$ 108.8                 | 0.38 $\pm$ 0.06                   | 20.5 $\pm$ 0.7                   |
|                       | 4.8                      | 146.5 $\pm$ 1.4                   | 0.12 $\pm$ 0.02                   | 27.0 $\pm$ 1.8                   |
|                       | <b>5.6</b>               | <b>142.8 <math>\pm</math> 1.2</b> | <b>0.14 <math>\pm</math> 0.01</b> | <b>32.3 <math>\pm</math> 2.4</b> |
|                       | 6.4                      | 138.0 $\pm$ 2.6                   | 0.14 $\pm$ 0.02                   | 33.2 $\pm$ 1.4                   |
| + PAMOct              | 4.0                      | > 10 <sup>5</sup>                 | 1.00 $\pm$ 0.00                   | 0.0 $\pm$ 0.0                    |
|                       | 4.8                      | > 10 <sup>5</sup>                 | 1.00 $\pm$ 0.00                   | 15.6 $\pm$ 0.9                   |
|                       | 5.6                      | 312.1 $\pm$ 10.2                  | 0.40 $\pm$ 0.06                   | 24.6 $\pm$ 1.4                   |
|                       | <b>6.4</b>               | <b>209.8 <math>\pm</math> 6.8</b> | <b>0.34 <math>\pm</math> 0.04</b> | <b>33.3 <math>\pm</math> 0.9</b> |
|                       | 7.2                      | 198.4 $\pm$ 3.8                   | 0.30 $\pm$ 0.02                   | 35.2 $\pm$ 1.2                   |
|                       | 8.0                      | 193.0 $\pm$ 2.9                   | 0.29 $\pm$ 0.03                   | 38.4 $\pm$ 2.4                   |
| + PAMDec              | 5.6                      | > 10 <sup>5</sup>                 | 1.00 $\pm$ 0.00                   | -7.2 $\pm$ 5.1                   |
|                       | 6.4                      | > 10 <sup>5</sup>                 | 1.00 $\pm$ 0.00                   | 0.0 $\pm$ 0.0                    |
|                       | 7.2                      | 250.1 $\pm$ 10.3                  | 0.28 $\pm$ 0.06                   | 15.7 $\pm$ 2.6                   |
|                       | 8.0                      | 163.0 $\pm$ 2.4                   | 0.14 $\pm$ 0.09                   | 26.6 $\pm$ 3.1                   |
|                       | <b>8.8</b>               | <b>157.5 <math>\pm</math> 4.6</b> | <b>0.16 <math>\pm</math> 0.08</b> | <b>31.9 <math>\pm</math> 2.5</b> |
|                       | 9.6                      | 151.4 $\pm$ 1.7                   | 0.12 $\pm$ 0.02                   | 30.2 $\pm$ 1.0                   |

#### 4. Calcein release from liposomes

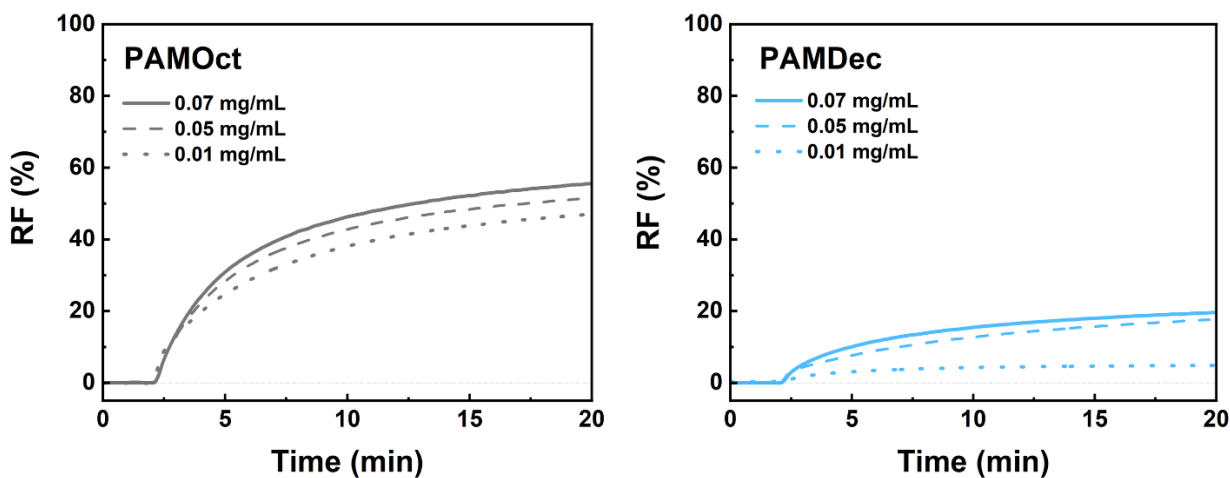

**Fig. S3.** Time-course of calcein leakage from the anionic SUVs treated with the polycations at 2 min. Liposomes were treated with PAMOct and PAMDec at above their CMC: 0.07 and 0.05 mg/mL and below CMC: 0.01 mg/mL. The dye was completely released by adding Triton X-100 and set as 100% leakage.

#### 5. Calcein release from HSFs

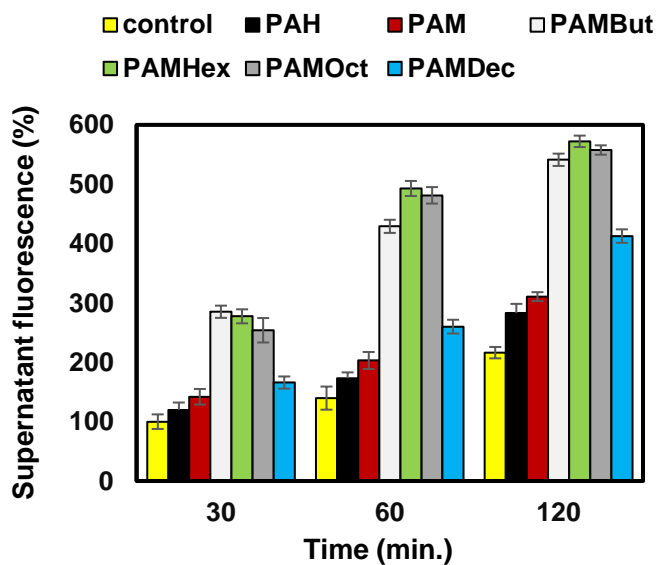

**Fig. S4** Fluorescence intensity of calcein in supernatants after 30, 60, and 120 min incubation of HSFs with polymer solutions (PAH, PAM, and PAMAiks - 10  $\mu$ g/mL). As a control, cells untreated with polymers were used. Average values  $\pm$  s.d. of two different experiments, each in triplicate, are shown.

## 6. Polymers cytotoxicity after 48h of HSFs culture.

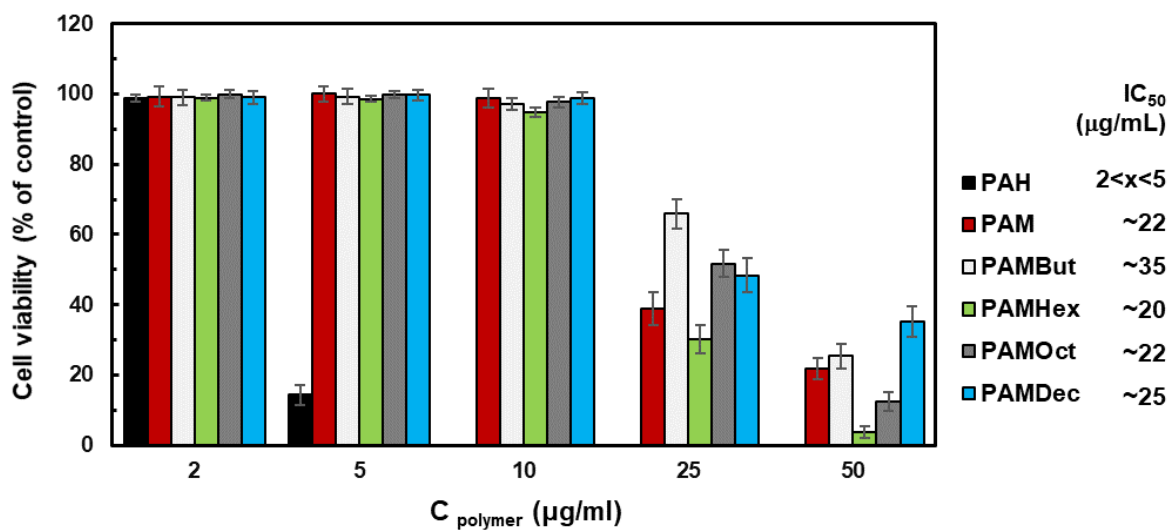

**Fig. S5** Cytotoxicity of the polyelectrolytes to HSFs was measured by the FDA-EB assay. HSFs were incubated for 48 h in a medium containing the various polymers: PAH, PAM, and PAMAlks. The IC<sub>50</sub> values after 48 h of incubation assessed against HSFs are given on the right.

### References:

1. A. Chattopadhyay and E. London, Fluorimetric Determination of Critical Micelle Concentration Avoiding Interference from Detergent Charge, *Anal. Biochem.*, 1984, **139**, 408-412.
